# Supplementary material for: Histone H1 Subtypes Differentially Modulate Chromatin Condensation without Preventing ATP-Dependent Remodeling by SWI/SNF or NURF
Source: PubMed Central journal article supplement (PMC2748705; doi:10.1371/journal.pone.0007243), 2009-10-01
Supplement: pone.0007243.s003.pdf [file pone.0007243.s003.pdf]

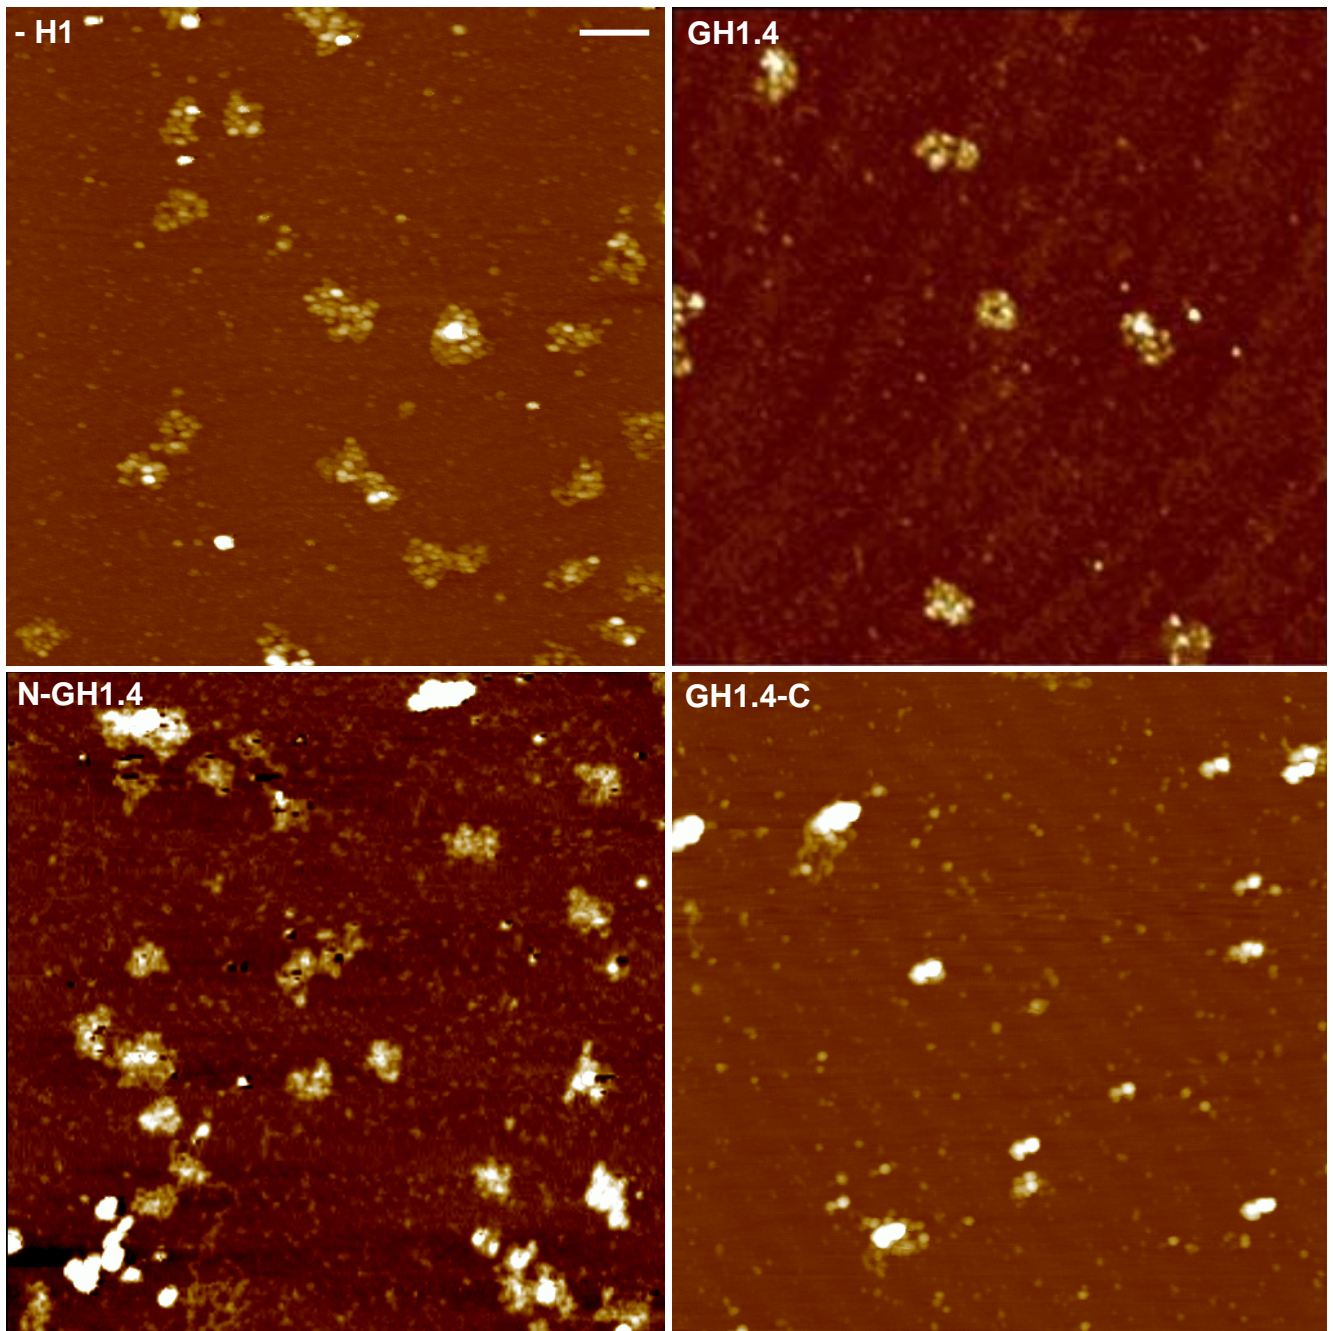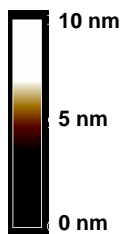

**Figure S3**
