# Supplementary material for: Histone H1 Subtypes Differentially Modulate Chromatin Condensation without Preventing ATP-Dependent Remodeling by SWI/SNF or NURF
Source: PubMed Central journal article supplement (PMC2748705; doi:10.1371/journal.pone.0007243), 2009-10-01
Supplement: pone.0007243.s004.pdf [file pone.0007243.s004.pdf]

H1 . 5 -MSETAPAETATP--APVEKSPAKKKATKKAAGAGAARKKATGPPV SELITKAVAA SERNGL SLA-ALKKALAAGGYDVEKNNSRIKLGKSLV SKGTLVQTKGTGASG SFKLNKK  
H1 . 4 -MSETAPAAPAAP--APA EKTPVKKKARKS---AGAAKRKASGPPV SELITKAVAA SERSGV SLA-ALKKALAAAAGYDVEKNNSRIKLGKSLV SKGTLVQTKGTGASG SFKLNKK  
H1 . 2 -MSETAPAAPAAA--PPAEKAPVKKKA AKKAG-GTP--RKASGPPV SELITKAVAA SERSGV SLA-ALKKALAAAAGYDVEKNNSRIKLGKSLV SKGTLVQTKGTGASG SFKLNKK  
H1 . 3 -MSETAPLAPTIP--APA EKTPVKKK-AKKAG-ATAGKRKASGPPV SELITKAVAA SERSGV SLA-ALKKALAAAAGYDVEKNNSRIKLGKSLV SKGTLVQTKGTGASG SFKLNKK  
H1 . 1 -MSETVPPAPAA S--AAPEKPLAGKKAKKPAKAAAA SKKKPAGP SV SELIVQAA S SERGGV SLA-ALKKALAAAAGYDVEKNNSRIKLGKSLV SKGTLVQTKGTGASG SFKLNKK  
H1 . T -MSETVPAASASAGVAAMEKLP TKKRGRKPAG-LI SASRKVPNL SV SKLITEAL SV SERVGMISLV-ALKKALAAAAGYDVEKNNSRIKLSL KSLV NKGILVQTRGTGASG SFKLSK  
H1 . 0 -MTENSTAPAAK-----PKRAKASKST-----DHPKYSDMIVAAIQ AENRAGSSRQ-SIQKYIKSHYKVG ENAHSQIKLSIKRLVTTGVLKQTKGTVGASG SFRLAKS  
H1 . X MSVELEEALPVTTAEG-MAKKVTKAGGSAAL SP SKKRKNSKKKNQPGKY SQLV VETIRRLERNSS LAKIYTEAKVPWF DQNGRTYLYKSIKALVQNDTLLQVKGTVGANG SFKLNKK

H1 . 5 AA SGEAKPKAKKAGAAKAKKPAGAT--PKKAKKAAGAKKAVKKT PKKAKPAAAAGV-KKV  
H1 . 4 AA SGEAKPKAKKAGAAKAKKPAGAAKPKKATGAATPKKS AKKTPKKAKPAAAAG-AKK  
H1 . 2 AA SGEAKPKVKKAGGTPKPKPVGA AKPKKAAGGATPKKS AKKTPKKAKPAAATVTKV  
H1 . 3 AA SGEKPKAKKAGAAKPRKPA GAAKPKKVAGAATPKKS IKKTPKKVKKPATAAGTKKV  
H1 . 1 ASSVETKPGASKV--ATRTKATGASKLKKATGAS--KKS VK-TPKAKKPAATR K---S  
H1 . T VIPKSTRSKAKKSV SAKTKK-----LVL SRD SKSPKTAK-TNKRAKKPRATTP--KT  
H1 . 0 DEPKKSVAFKKTKEIKKVATPKKASKPKKAA SKAPT KKPATPVKKAKKLAATP--KK  
H1 . X KLEGGGE---RRGAPAAATAPAPT AHKAKKAAPGAAGSRRADKKPARGQKPEQRSH--KK

**Figure S4**
